# Supplementary material for: Synthesis of Bio-Based Polyester Resins for Vat Photopolymerization 3D Printing
Source: MDPI journal article supplement (doi:10.3390/ma17081890), 2024-04-19
Supplement: s1 [file s1]

Supplementary Materials

# Synthesis of Bio-Based Polyester Resins for Vat Photopolymerization 3D Printing

Ines Cazin <sup>1</sup>, Martin Ocepek <sup>2</sup>, Janez Kecelj <sup>2</sup>, Aleš Stanislav Stražar <sup>2</sup> and Sandra Schlögl <sup>1,\*</sup>

<sup>1</sup> Polymer Competence Center Leoben GmbH, Sauraugasse 1, A-8700 Leoben, Austria; ines.cazin@pccl.at

<sup>2</sup> Helios Resins, Količevo 65, 1230 Domžale, Slovenia; martin.ocepek@resinshelios.com (M.O.); janez.kecelj@resinshelios.com (J.K.); alesstanislav.strazar@resinshelios.com (A.S.S.)

\* Correspondence: sandra.schloegl@pccl.at

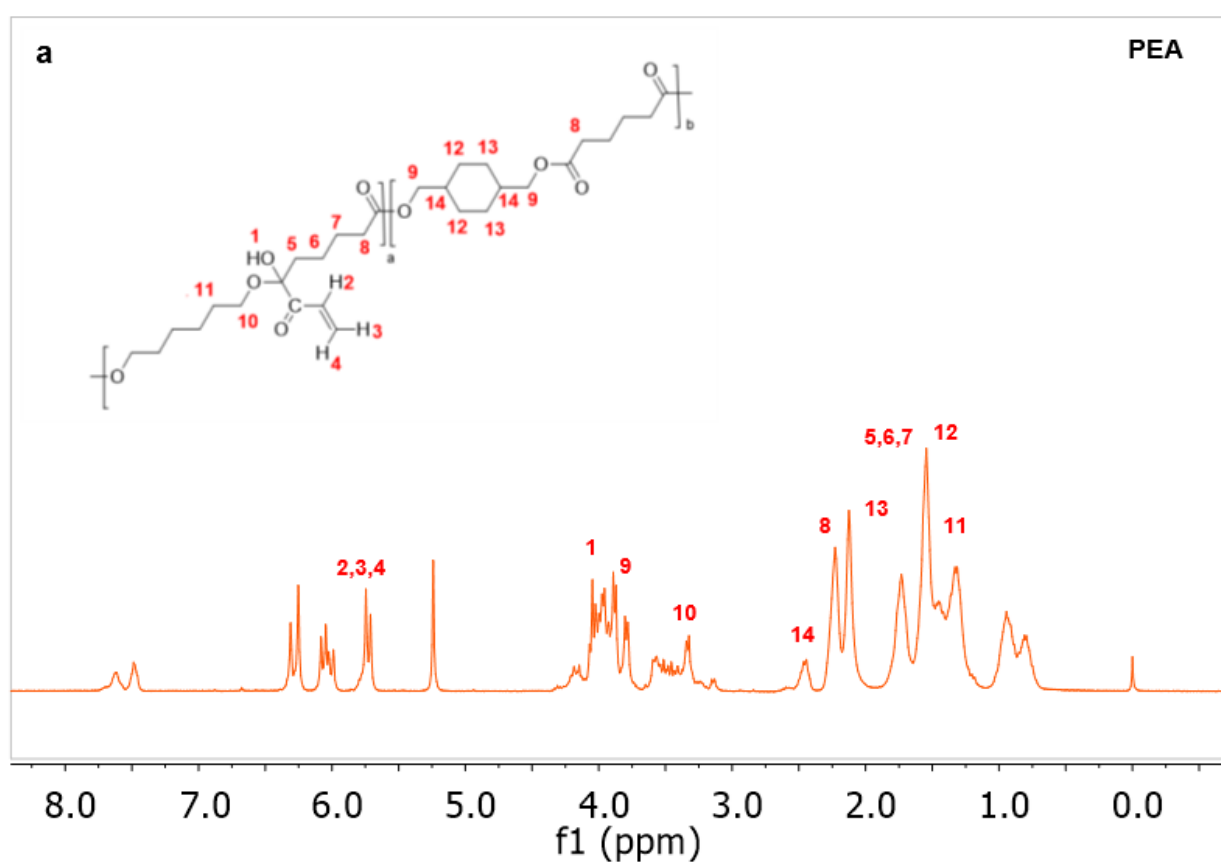

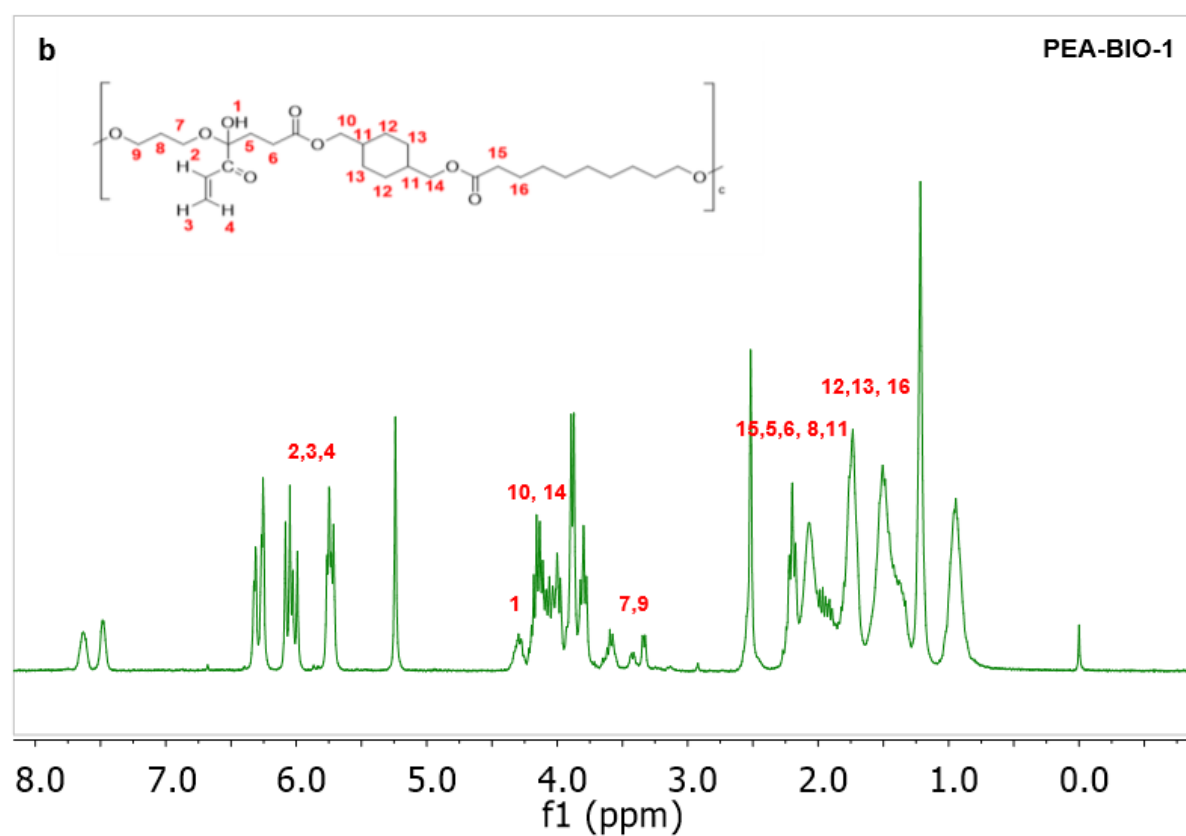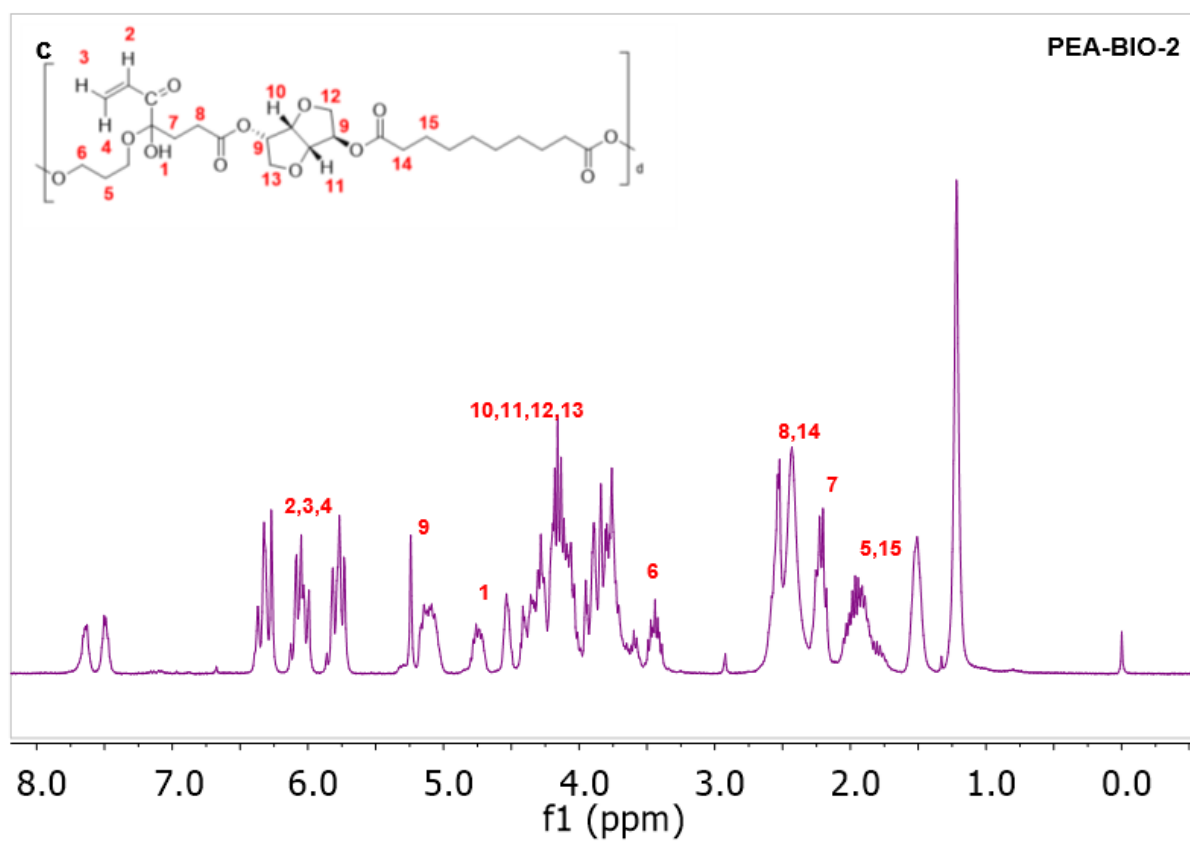

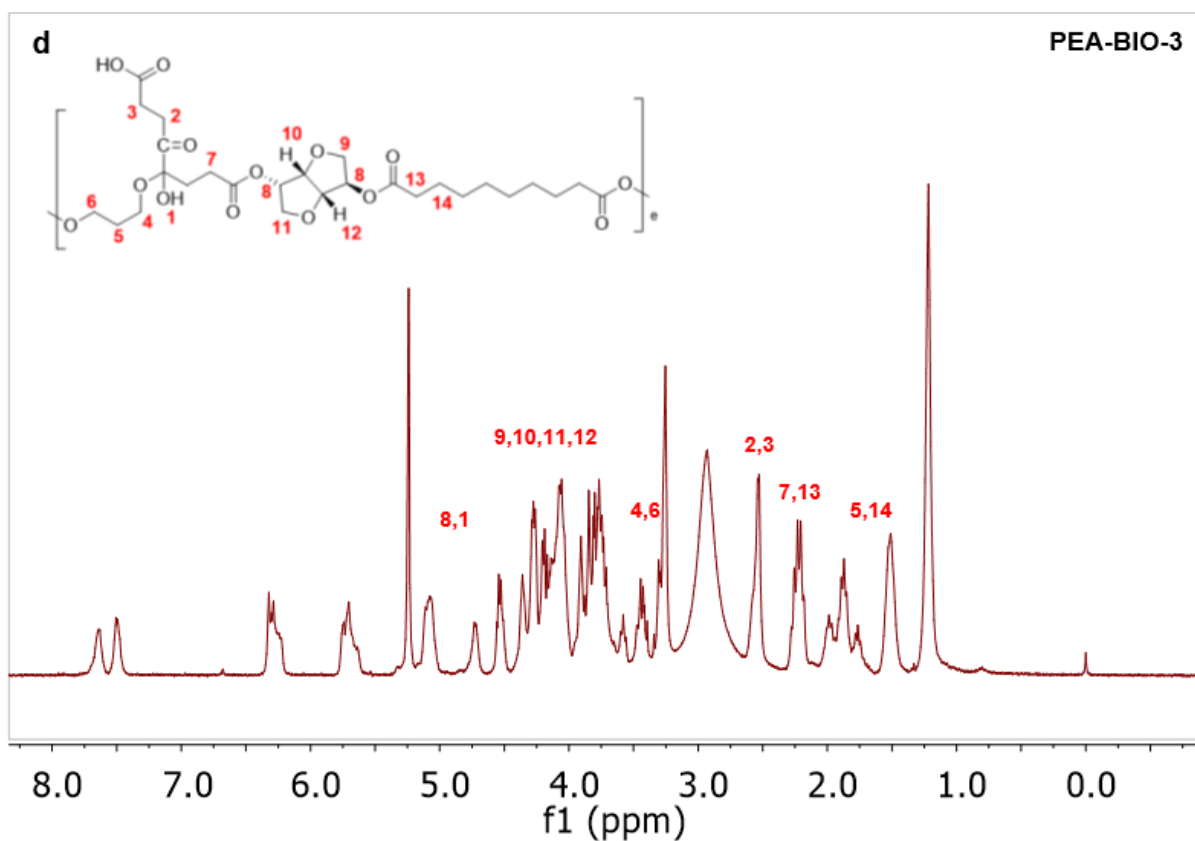

**Figure S1.** <sup>1</sup>H-NMR spectra of acrylic modified polyester resins: (a) PEA, (b) PEA-BIO-1, (c) PEA-BIO-2, (d) PEA-BIO-3.

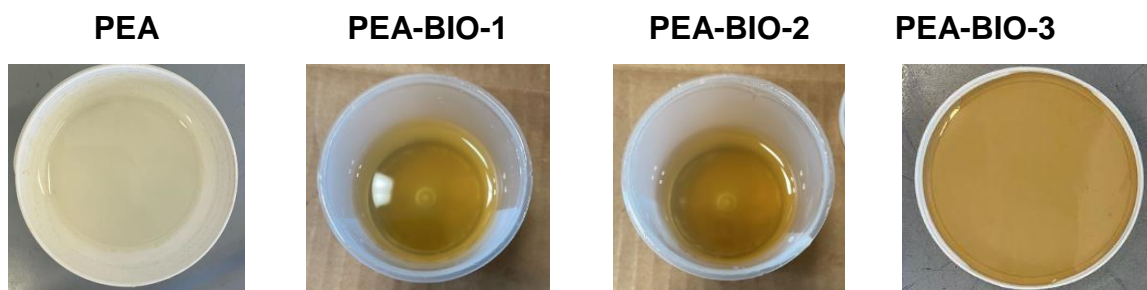

**Figure S2.** Appearance of synthetic and bio-based polyester acrylates.

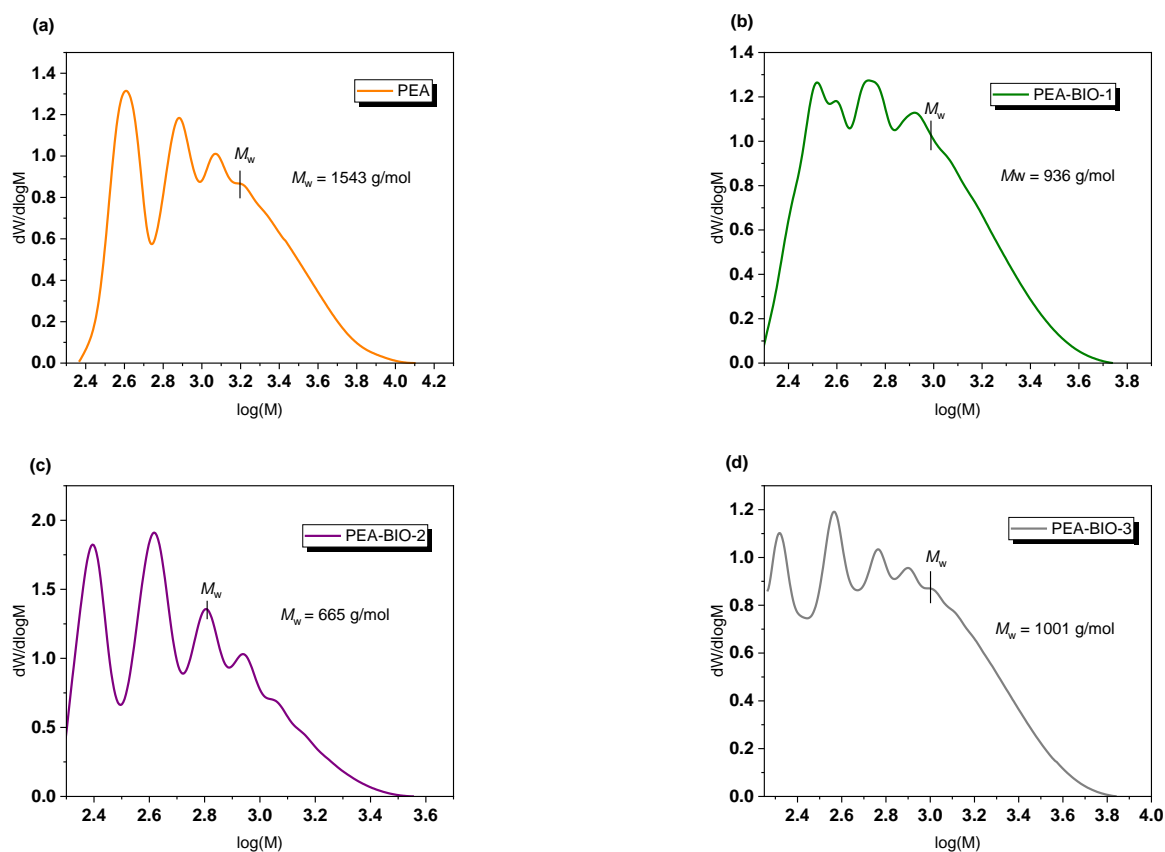

Figure S3. GPC data for (a) PEA, (b) PEA-BIO-1, (c) PEA-BIO-2 and (d) PEA-BIO-3.

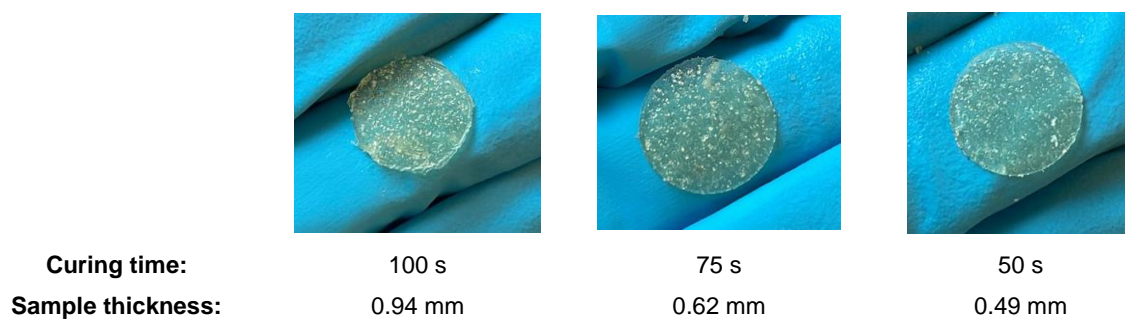

Figure S4. DLP 3D-printed specimens from PEA-BIO-3 resin diluted with AEUG (mass ratio was 1:1).

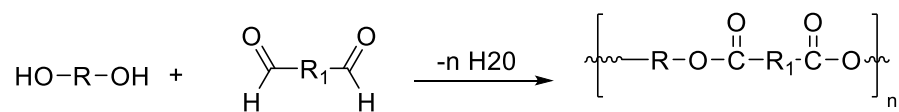

Figure S5. Schematic representation of polyester synthesis.
